# Supplementary material for: Human biomonitoring of neonicotinoid exposures: case studies after the use of a spray-agent to ornamental plants and a topical medication to pets
Source: Frontiers journal article supplement (doi:10.3389/fpubh.2023.1321138), 2024-01-23
Supplement: Data_Sheet_1.PDF [file Data_Sheet_1.PDF]

*Supplementary Material to*

**Human biomonitoring of neonicotinoid exposures: case studies after use of a spray-agent on ornamental plants and a topical medication on pets**

**Sonja A. Wrobel<sup>1</sup>, Stephan Koslitz<sup>1</sup>, Daniel Bury<sup>1</sup>, Heiko Hayen<sup>2</sup>, Holger M. Koch<sup>1</sup>, Thomas Brüning<sup>1</sup>, Heiko U. Käfferlein<sup>1,\*</sup>**

<sup>1</sup>Institute for Prevention and Occupational Medicine of the German Social Accident Insurance, Ruhr University Bochum (IPA), Bürkle-de-la-Camp-Platz 1, 44789 Bochum, Germany

<sup>2</sup>Institute of Inorganic and Analytical Chemistry, University of Münster, Corrensstraße 48, 48149 Münster, Germany

**\* Correspondence:**

Heiko U. Käfferlein

[heiko.kaefflerlein@dguv.de](mailto:heiko.kaefflerlein@dguv.de)

## 1 Supplementary Data

### 1.1 Product information of the used NNI-containing agents

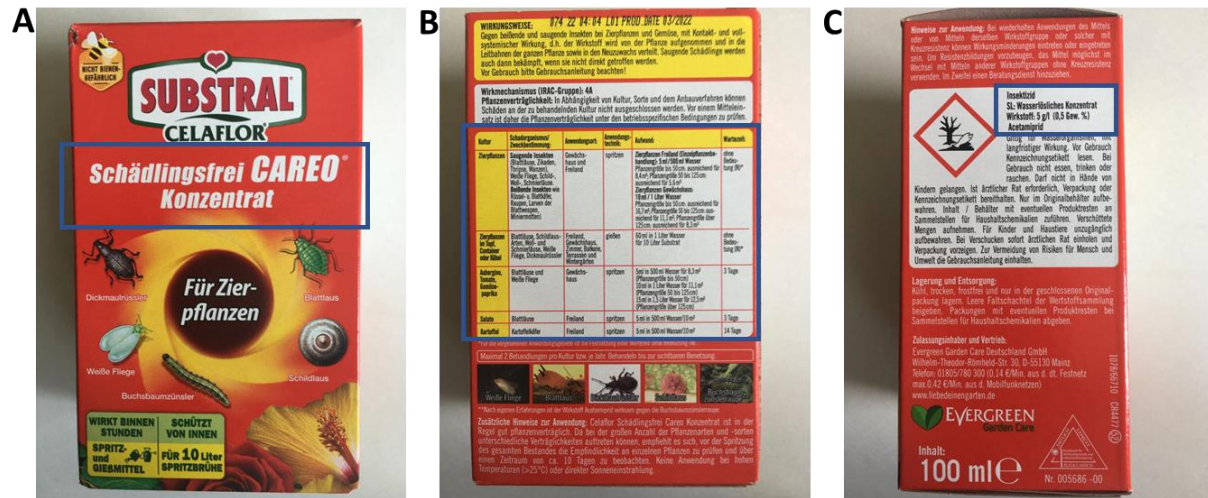

**Supplementary Figure 1.** Pictures of the commercially purchased spray-agent containing ACE for use on ornamental plants. Blue boxes indicate relevant information on the front (A), back (B), and side (C) of the package indicating the active ingredient ('Acetamiprid; 5 g/L; 0.5wt.-%') and its recommended use.

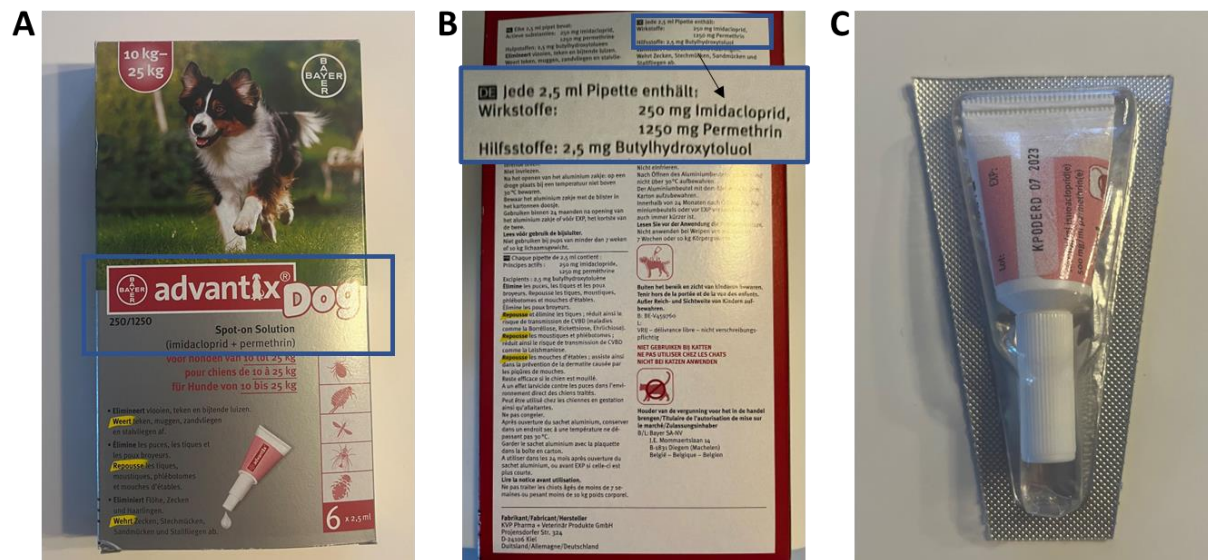

**Supplementary Figure 2.** Pictures of the commercially purchased spot-on solution containing IMI for use on dogs. Blue boxes indicate relevant information. **A:** Front of the package showing the name of the veterinary product ('Advantix - Dog'). **B:** Back of the package listing the ingredients of the solution (2.5 mL solution contains 250 mg of IMI). **C:** Pipette containing the spot-on solution.

## 1.2 Photo series on the application of solutions containing NNIs

### Preparation

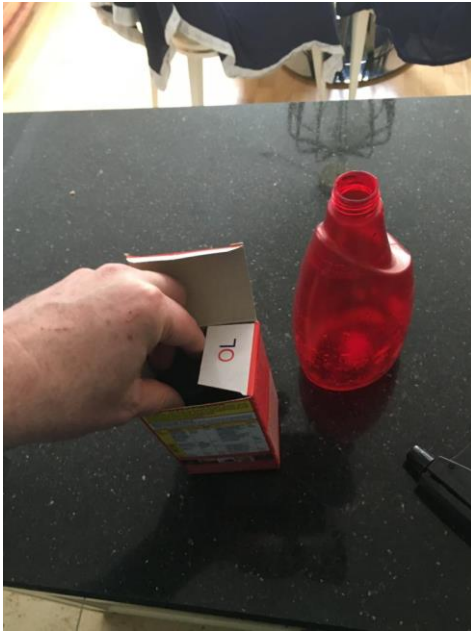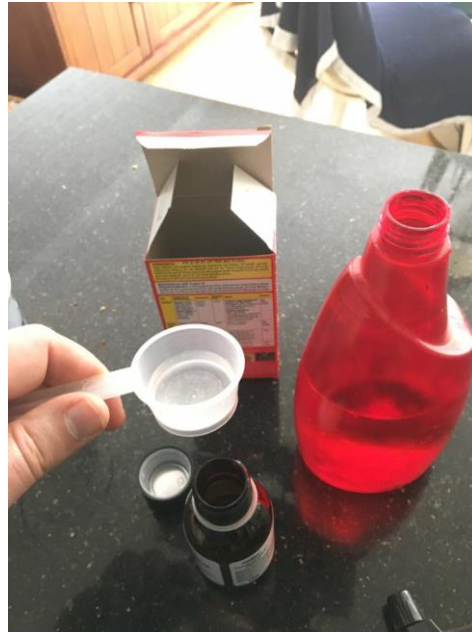

### Treatment

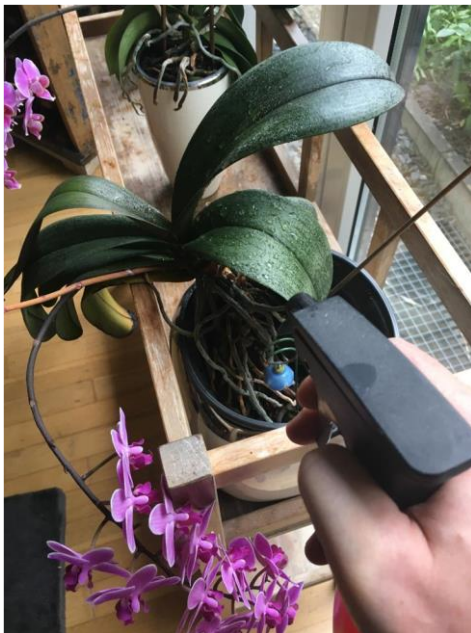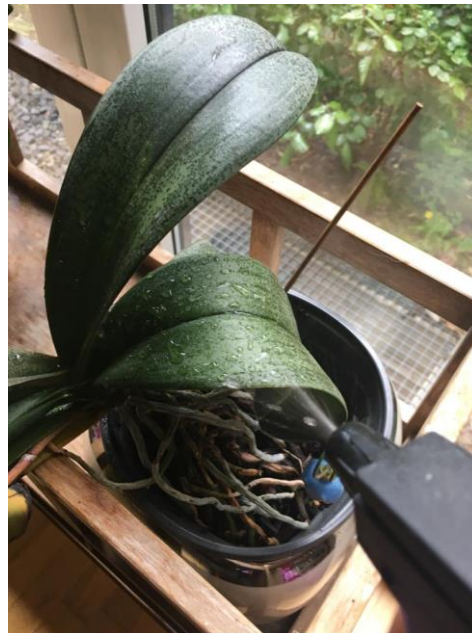

**Supplementary Figure 3.** Depiction of the plant treatment using an ACE-containing spray-agent. Preparation of treatment solution (top) and spray-treating orchids (bottom). Due to aerial roots and to avoid stagnant water, orchids, in deviation from the manufacturer's specifications for indoor ornamental flowers, were sprayed rather than watered.



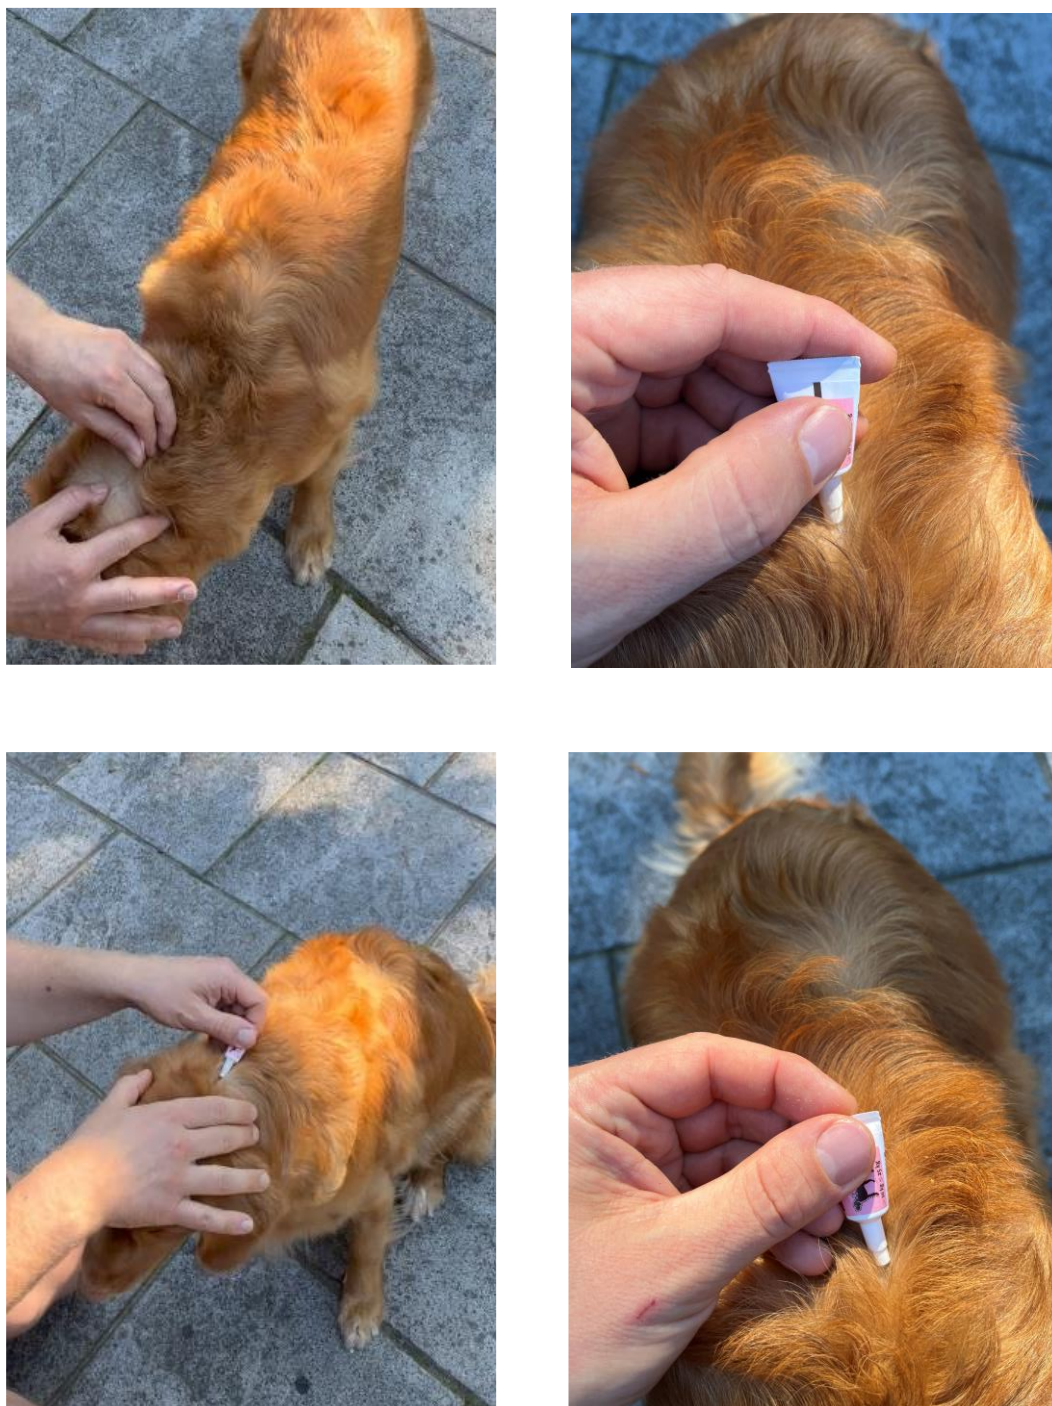

**Supplementary Figure 3.** Depiction of the dog treatment using an IMI-containing spot-on solution.

### 1.3 Volunteer and sample information

|                 | Age [years] | Body weight [kg] | No. of samples | Total volume [L] |
|-----------------|-------------|------------------|----------------|------------------|
| ACE application | 52          | 83               | 16             | 4.943            |
| IMI application | 40          | 100              | 16             | 5.055            |

**Supplementary Table 1.** Age and body weight of the volunteers at time of the application and indication of the number of samples and the total urine volume during sampling.
